# Supplementary material for: Machine learning models for classification and identification of significant attributes to detect type 2 diabetes
Source: PubMed Central journal article supplement (PMC8828812; doi:10.1007/s13755-021-00168-2), 2022-02-09
Supplement: 13755_2021_168_MOESM1_ESM.pdf [file 13755_2021_168_MOESM1_ESM.pdf]

Table 1: Accuracy of Different Classifiers

|      |         | GAMBoost     | RLR          | PMR          | BGLM         | PLR          | GLM          | SDWD         | GBM          | GAMLOESS     | NB    |
|------|---------|--------------|--------------|--------------|--------------|--------------|--------------|--------------|--------------|--------------|-------|
| PIDD | Minimum | 69.74        | 67.11        | 67.11        | 67.11        | 67.11        | 67.11        | 69.74        | 68.42        | 69.74        | 67.11 |
|      | Median  | 76.62        | <b>77.92</b> | 77.63        | <b>77.92</b> | <b>77.92</b> | 77.63        | <b>77.92</b> | 76.47        | 76.62        | 75.32 |
|      | Mean    | 77.47        | 77.55        | 77.44        | 77.50        | 77.57        | 77.44        | 77.14        | 76.67        | 76.87        | 75.62 |
|      | Maximum | 88.31        | 84.42        | 84.42        | 84.42        | 84.42        | 84.42        | 84.21        | 85.53        | 85.71        | 84.42 |
| DS1  | Minimum | 69.74        | 67.11        | 67.11        | 67.11        | 67.11        | 67.11        | 67.11        | 65.79        | 68.42        | 64.47 |
|      | Median  | 77.13        | 76.47        | 76.47        | 76.47        | 76.47        | 76.47        | 76.47        | 76.62        | 77.27        | 76.62 |
|      | Mean    | 77.03        | 76.33        | 76.51        | 76.51        | 76.51        | 76.51        | 76.38        | 77.11        | 77.18        | 75.59 |
|      | Maximum | 87.01        | 84.42        | 85.71        | 85.71        | 85.71        | 85.71        | 83.12        | 88.31        | 85.71        | 84.42 |
| DS2  | Minimum | 69.74        | 65.79        | 65.79        | 65.79        | 65.79        | 65.79        | 69.74        | 68.42        | 68.42        | 65.79 |
|      | Median  | 76.62        | 77.13        | 77.13        | 77.13        | 77.13        | 77.13        | <b>77.92</b> | 76.62        | 76.62        | 76.62 |
|      | Mean    | 77.60        | 76.95        | 76.95        | 76.92        | 76.95        | 76.95        | 77.16        | 76.72        | 77.06        | 77.44 |
|      | Maximum | 88.31        | 83.12        | 85.71        | 85.71        | 84.42        | 85.71        | 84.21        | 84.42        | 84.42        | 85.71 |
| DS3  | Minimum | 69.74        | 65.79        | 65.79        | 65.79        | 65.79        | 65.79        | 67.11        | 67.11        | 67.11        | 66.23 |
|      | Median  | 76.62        | 77.13        | 77.13        | 77.13        | 77.13        | 77.13        | 75.82        | 77.13        | 76.47        | 76.62 |
|      | Mean    | 77.08        | 76.48        | 76.51        | 76.48        | 76.51        | 76.51        | 76.38        | 77.21        | 76.77        | 76.27 |
|      | Maximum | 87.01        | 85.71        | 85.71        | 85.71        | 85.71        | 85.71        | 83.12        | 87.01        | 87.01        | 84.42 |
| DS4  | Minimum | 69.74        | 68.42        | 67.11        | 68.42        | 67.11        | 67.11        | 69.74        | 66.23        | <b>71.05</b> | 65.79 |
|      | Median  | 77.27        | 76.62        | 77.78        | 77.63        | 77.78        | 77.78        | 77.27        | 76.62        | 76.47        | 76.62 |
|      | Mean    | 77.55        | 77.27        | 77.29        | 77.37        | 77.29        | 77.29        | 77.08        | 76.83        | 77.19        | 76.93 |
|      | Maximum | 88.31        | 85.71        | 85.71        | 85.71        | 85.71        | 85.71        | 84.42        | <b>90.91</b> | 88.31        | 86.84 |
| DS5  | Minimum | 68.83        | 67.11        | 67.11        | 67.11        | 67.11        | 67.11        | 69.74        | 68.83        | 69.74        | 68.83 |
|      | Median  | <b>77.92</b> | <b>77.92</b> | <b>77.92</b> | <b>77.92</b> | <b>77.92</b> | <b>77.92</b> | 77.13        | 76.62        | 76.62        | 76.62 |
|      | Mean    | <b>77.73</b> | 77.32        | 77.29        | 77.32        | 77.29        | 77.29        | 77.03        | 76.80        | 77.42        | 77.19 |
|      | Maximum | 89.61        | 88.31        | 88.31        | 88.31        | 88.31        | 88.31        | 84.42        | 88.31        | 85.71        | 85.71 |
| DS6  | Minimum | 69.74        | 65.79        | 65.79        | 65.79        | 65.79        | 65.79        | 67.11        | 67.11        | 69.74        | 68.42 |
|      | Median  | <b>77.92</b> | 76.62        | 75.97        | 76.47        | 76.47        | 76.47        | 76.62        | 77.78        | <b>77.92</b> | 76.62 |
|      | Mean    | 77.60        | 76.69        | 76.66        | 76.66        | 76.59        | 76.61        | 76.82        | 77.47        | 77.63        | 76.98 |
|      | Maximum | 87.01        | 85.71        | 85.71        | 85.71        | 85.71        | 85.71        | 85.71        | 88.31        | 87.01        | 87.01 |

Table 2: Kappa Statistics of Different Classifiers

|      |         | GAMBoost     | RLR   | PMR   | BGLM  | PLR   | GLM   | SDWD  | GBM          | GAMLOESS     | NB           |
|------|---------|--------------|-------|-------|-------|-------|-------|-------|--------------|--------------|--------------|
| PIDD | Minimum | 28.13        | 24.84 | 24.84 | 24.84 | 24.84 | 24.84 | 28.75 | 24.80        | 28.13        | 24.84        |
|      | Median  | 46.86        | 48.17 | 48.28 | 48.67 | 48.67 | 48.28 | 46.51 | 43.66        | 46.86        | 44.01        |
|      | Mean    | 47.34        | 47.84 | 47.65 | 47.73 | 47.96 | 47.65 | 45.27 | 45.35        | 47.29        | 44.57        |
|      | Maximum | 73.66        | 64.57 | 64.57 | 64.57 | 64.57 | 64.57 | 64.26 | 68.14        | 68.89        | 64.57        |
| DS1  | Minimum | 26.68        | 25.17 | 25.17 | 26.24 | 25.17 | 25.17 | 24.84 | 22.57        | 29.85        | 20.34        |
|      | Median  | 47.17        | 45.20 | 45.65 | 45.20 | 45.65 | 45.65 | 44.65 | 45.42        | 48.08        | 45.85        |
|      | Mean    | 46.74        | 45.19 | 45.65 | 45.60 | 45.65 | 45.65 | 44.26 | 46.66        | 47.85        | 44.15        |
|      | Maximum | 70.99        | 65.78 | 68.89 | 68.89 | 68.89 | 68.89 | 61.95 | 74.11        | 67.81        | 63.93        |
| DS2  | Minimum | 28.13        | 22.57 | 22.57 | 22.57 | 22.57 | 22.57 | 28.75 | 27.16        | 25.73        | 22.57        |
|      | Median  | 47.14        | 45.71 | 46.68 | 46.68 | 46.87 | 46.68 | 46.51 | 44.36        | 47.32        | 49.44        |
|      | Mean    | 47.66        | 46.03 | 46.36 | 46.28 | 46.37 | 46.36 | 45.34 | 45.50        | 47.69        | <b>48.97</b> |
|      | Maximum | 73.66        | 61.95 | 67.81 | 67.81 | 64.57 | 67.81 | 64.26 | 65.18        | 65.18        | 67.81        |
| DS3  | Minimum | 26.68        | 24.00 | 24.00 | 24.00 | 24.00 | 24.00 | 24.84 | 24.84        | 27.59        | 23.24        |
|      | Median  | 47.17        | 46.38 | 46.38 | 46.38 | 46.38 | 46.38 | 43.79 | 45.42        | 45.85        | 47.98        |
|      | Mean    | 47.00        | 45.56 | 45.69 | 45.62 | 45.69 | 45.69 | 44.30 | 46.92        | 46.85        | 46.80        |
|      | Maximum | 70.99        | 68.36 | 68.36 | 68.36 | 68.36 | 68.36 | 61.95 | 70.99        | 70.48        | 66.35        |
| DS4  | Minimum | 28.13        | 26.68 | 23.39 | 26.68 | 23.39 | 23.39 | 27.68 | 17.41        | <b>31.42</b> | 21.09        |
|      | Median  | 47.78        | 46.86 | 47.38 | 46.86 | 47.38 | 47.38 | 46.57 | 46.88        | 47.12        | 48.28        |
|      | Mean    | 47.58        | 47.17 | 47.31 | 47.48 | 47.31 | 47.31 | 45.79 | 46.95        | 48.14        | 47.03        |
|      | Maximum | 74.11        | 68.36 | 68.36 | 68.36 | 68.36 | 68.36 | 64.57 | <b>78.77</b> | 74.55        | 69.65        |
| DS5  | Minimum | 28.13        | 24.84 | 24.84 | 24.84 | 24.84 | 24.84 | 27.68 | 26.24        | 28.13        | 28.13        |
|      | Median  | <b>49.87</b> | 48.48 | 48.81 | 49.17 | 48.81 | 48.81 | 46.10 | 45.41        | 46.86        | 47.12        |
|      | Mean    | 48.61        | 47.32 | 47.30 | 47.36 | 47.30 | 47.30 | 45.64 | 45.80        | 48.53        | 48.12        |
|      | Maximum | 77.19        | 74.11 | 74.11 | 74.11 | 74.11 | 74.11 | 64.57 | 74.11        | 68.36        | 67.81        |
| DS6  | Minimum | 26.68        | 22.57 | 22.57 | 22.57 | 22.57 | 22.57 | 24.84 | 24.84        | 28.96        | 28.53        |
|      | Median  | 49.36        | 44.87 | 44.87 | 45.35 | 44.14 | 44.87 | 43.89 | 47.49        | 49.43        | 46.38        |
|      | Mean    | 48.28        | 45.73 | 45.81 | 45.94 | 45.78 | 45.85 | 45.22 | 47.65        | 48.80        | 47.90        |
|      | Maximum | 71.48        | 67.81 | 67.81 | 68.36 | 68.36 | 68.36 | 67.23 | 74.11        | 70.99        | 70.48        |

Table 3: AUROC of Different Classifiers

|      |         | GAMBoost | RLR   | PMR   | BGLM  | PLR   | GLM   | SDWD  | GBM   | GAMLOESS     | NB           |
|------|---------|----------|-------|-------|-------|-------|-------|-------|-------|--------------|--------------|
| PIDD | Minimum | 75.46    | 70.31 | 70.15 | 70.08 | 70.15 | 70.15 | 69.85 | 74.00 | 75.93        | 70.69        |
|      | Median  | 84.81    | 83.28 | 83.15 | 83.22 | 83.15 | 83.15 | 83.32 | 84.00 | 84.38        | 82.37        |
|      | Mean    | 84.39    | 83.04 | 83.04 | 83.05 | 83.03 | 83.04 | 83.17 | 83.68 | 84.08        | 82.39        |
|      | Maximum | 92.15    | 91.41 | 91.78 | 91.78 | 91.70 | 91.78 | 92.00 | 91.11 | 91.19        | 91.11        |
| DS1  | Minimum | 72.77    | 69.46 | 69.31 | 69.38 | 69.38 | 69.38 | 68.77 | 73.77 | 75.38        | 70.23        |
|      | Median  | 84.04    | 82.74 | 82.57 | 82.56 | 82.56 | 82.56 | 82.78 | 83.61 | 84.57        | 83.43        |
|      | Mean    | 83.89    | 82.52 | 82.48 | 82.46 | 82.48 | 82.47 | 82.48 | 83.75 | 84.49        | 82.98        |
|      | Maximum | 92.52    | 90.59 | 90.89 | 91.19 | 91.19 | 91.19 | 90.96 | 95.11 | 95.19        | 92.44        |
| DS2  | Minimum | 74.77    | 68.23 | 68.31 | 68.31 | 68.31 | 68.31 | 68.23 | 74.00 | 75.00        | 74.54        |
|      | Median  | 84.98    | 83.26 | 83.32 | 83.32 | 83.32 | 83.32 | 83.25 | 84.09 | 84.62        | 83.89        |
|      | Mean    | 84.53    | 82.93 | 82.99 | 82.99 | 82.99 | 82.99 | 83.09 | 83.94 | 84.54        | 84.20        |
|      | Maximum | 92.00    | 91.85 | 92.15 | 92.22 | 92.15 | 92.15 | 92.37 | 91.85 | 91.70        | 91.46        |
| DS3  | Minimum | 73.46    | 68.92 | 69.15 | 69.15 | 69.15 | 69.15 | 69.00 | 73.38 | 74.31        | 73.69        |
|      | Median  | 84.59    | 82.74 | 82.63 | 82.63 | 82.63 | 82.63 | 82.70 | 83.59 | 84.70        | 83.24        |
|      | Mean    | 84.09    | 82.42 | 82.44 | 82.45 | 82.44 | 82.44 | 82.49 | 83.63 | 84.28        | 83.31        |
|      | Maximum | 93.48    | 91.48 | 91.56 | 91.56 | 91.56 | 91.56 | 91.04 | 94.52 | <b>95.26</b> | 92.52        |
| DS4  | Minimum | 74.69    | 72.00 | 72.00 | 72.00 | 72.08 | 72.00 | 71.08 | 74.92 | 76.89        | 71.38        |
|      | Median  | 85.22    | 82.26 | 82.37 | 82.38 | 82.33 | 82.37 | 82.64 | 84.00 | 85.06        | 83.62        |
|      | Mean    | 84.37    | 82.38 | 82.39 | 82.37 | 82.39 | 82.39 | 82.44 | 84.01 | 84.82        | 83.68        |
|      | Maximum | 92.44    | 92.59 | 92.67 | 92.59 | 92.67 | 92.67 | 93.11 | 93.19 | 93.85        | 94.00        |
| DS5  | Minimum | 75.00    | 70.92 | 71.31 | 71.31 | 71.23 | 71.31 | 71.46 | 74.15 | <b>76.92</b> | 76.62        |
|      | Median  | 84.85    | 82.15 | 82.27 | 82.27 | 82.34 | 82.27 | 82.81 | 84.49 | 85.08        | 84.62        |
|      | Mean    | 84.55    | 82.42 | 82.45 | 82.45 | 82.45 | 82.45 | 82.65 | 84.00 | 84.75        | <b>84.84</b> |
|      | Maximum | 92.74    | 93.11 | 93.11 | 93.11 | 93.11 | 93.11 | 93.63 | 92.81 | 93.41        | 93.70        |
| DS6  | Minimum | 73.69    | 71.54 | 71.23 | 71.23 | 71.23 | 71.23 | 71.92 | 73.85 | 74.62        | 75.00        |
|      | Median  | 84.78    | 81.21 | 81.17 | 81.17 | 81.17 | 81.17 | 81.55 | 84.30 | <b>85.36</b> | 84.96        |
|      | Mean    | 84.27    | 81.89 | 81.87 | 81.87 | 81.88 | 81.87 | 81.93 | 83.89 | 84.64        | 84.30        |
|      | Maximum | 93.56    | 92.59 | 92.89 | 92.89 | 92.89 | 92.89 | 92.59 | 93.70 | 94.30        | 94.00        |

Table 4: Sensitivity of Different Classifiers

|      |         | GAMBoost | RLR   | PMR   | BGLM  | PLR   | GLM   | SDWD         | GBM        | GAMLOESS | NB    |
|------|---------|----------|-------|-------|-------|-------|-------|--------------|------------|----------|-------|
| PIDD | Minimum | 82.00    | 78.00 | 78.00 | 78.00 | 78.00 | 78.00 | 78.00        | 78.00      | 74.00    | 72.00 |
|      | Median  | 88.00    | 88.00 | 88.00 | 88.00 | 88.00 | 88.00 | 90.00        | 88.00      | 86.00    | 84.00 |
|      | Mean    | 87.84    | 88.68 | 88.48 | 88.60 | 88.52 | 88.48 | 89.64        | 87.36      | 86.00    | 84.88 |
|      | Maximum | 94.00    | 96.00 | 96.00 | 96.00 | 96.00 | 96.00 | 96.00        | 96.00      | 96.00    | 96.00 |
| DS1  | Minimum | 80.00    | 76.00 | 76.00 | 76.00 | 76.00 | 76.00 | 78.00        | 76.00      | 76.00    | 74.00 |
|      | Median  | 88.00    | 88.00 | 88.00 | 88.00 | 88.00 | 88.00 | 90.00        | 88.00      | 88.00    | 84.00 |
|      | Mean    | 88.84    | 87.68 | 87.56 | 87.44 | 87.36 | 87.36 | 89.40        | 87.80      | 86.68    | 85.40 |
|      | Maximum | 96.00    | 96.00 | 96.00 | 96.00 | 96.00 | 96.00 | 96.00        | 96.00      | 96.00    | 96.00 |
| DS2  | Minimum | 80.00    | 76.00 | 76.00 | 76.00 | 76.00 | 76.00 | 82.00        | 78.00      | 74.00    | 76.00 |
|      | Median  | 88.00    | 88.00 | 88.00 | 88.00 | 88.00 | 88.00 | 90.00        | 86.00      | 86.00    | 86.00 |
|      | Mean    | 87.92    | 88.56 | 88.36 | 88.36 | 88.36 | 88.36 | 90.24        | 86.76      | 86.2     | 85.64 |
|      | Maximum | 94.00    | 96.00 | 96.00 | 96.00 | 96.00 | 96.00 | 96.00        | <b>100</b> | 96.00    | 96.00 |
| DS3  | Minimum | 78.00    | 74.00 | 74.00 | 74.00 | 74.00 | 74.00 | 78.00        | 76.00      | 74.00    | 72.00 |
|      | Median  | 88.00    | 88.00 | 88.00 | 88.00 | 88.00 | 88.00 | 90.00        | 88.00      | 86.00    | 84.00 |
|      | Mean    | 87.76    | 87.48 | 87.36 | 87.36 | 87.36 | 87.36 | 89.36        | 87.44      | 86.4     | 83.8  |
|      | Maximum | 96.00    | 96.00 | 96.00 | 96.00 | 96.00 | 96.00 | 96.00        | 96.00      | 96.00    | 98.00 |
| DS4  | Minimum | 80.00    | 78.00 | 78.00 | 78.00 | 78.00 | 78.00 | 82.00        | 76.00      | 76.00    | 76.00 |
|      | Median  | 88.00    | 88.00 | 88.00 | 88.00 | 88.00 | 88.00 | 90.00        | 87.00      | 86.00    | 86.00 |
|      | Mean    | 87.92    | 88.44 | 88.24 | 88.32 | 88.16 | 88.24 | 90.16        | 86.36      | 85.92    | 86.80 |
|      | Maximum | 94.00    | 98.00 | 98.00 | 98.00 | 98.00 | 98.00 | 98.00        | 96.00      | 94.00    | 96.00 |
| DS5  | Minimum | 80.00    | 78.00 | 78.00 | 78.00 | 78.00 | 78.00 | 88.00        | 76.00      | 76.00    | 76.00 |
|      | Median  | 88.00    | 88.00 | 88.00 | 88.00 | 88.00 | 88.00 | 94.00        | 86.00      | 86.00    | 86.00 |
|      | Mean    | 87.96    | 88.36 | 88.24 | 88.28 | 88.08 | 88.24 | 94.84        | 86.16      | 86.4     | 85.84 |
|      | Maximum | 94.00    | 96.00 | 96.00 | 96.00 | 96.00 | 96.00 | <b>100</b>   | 98.00      | 94.00    | 92.00 |
| DS6  | Minimum | 78.00    | 76.00 | 76.00 | 76.00 | 76.00 | 76.00 | <b>96.00</b> | 76.00      | 74.00    | 74.00 |
|      | Median  | 88.00    | 88.00 | 88.00 | 88.00 | 88.00 | 88.00 | <b>100</b>   | 87.00      | 88.00    | 86.00 |
|      | Mean    | 87.96    | 87.84 | 87.52 | 87.64 | 87.6  | 87.52 | <b>99.20</b> | 86.92      | 87.08    | 85.32 |
|      | Maximum | 96.00    | 98.00 | 98.00 | 98.00 | 98.00 | 98.00 | <b>100</b>   | 96.00      | 96.00    | 96.00 |

Table 5: Specificity of Different Classifiers

|      |         | GAMBoost | RLR   | PMR   | BGLM  | PLR   | GLM   | SDWD  | GBM          | GAMLOESS | NB           |
|------|---------|----------|-------|-------|-------|-------|-------|-------|--------------|----------|--------------|
| PIDD | Minimum | 37.04    | 37.04 | 40.74 | 40.74 | 40.74 | 40.74 | 34.62 | 33.33        | 40.74    | 38.46        |
|      | Median  | 55.56    | 55.56 | 55.56 | 55.56 | 55.56 | 55.56 | 51.85 | 54.70        | 59.26    | 59.26        |
|      | Mean    | 56.26    | 56.57 | 56.87 | 56.79 | 56.94 | 56.87 | 53.28 | 54.85        | 59.83    | 58.33        |
|      | Maximum | 74.07    | 76.92 | 76.92 | 76.92 | 76.92 | 76.92 | 74.07 | 80.77        | 84.62    | 74.07        |
| DS1  | Minimum | 34.62    | 33.33 | 34.62 | 34.62 | 34.62 | 34.62 | 33.33 | 34.62        | 40.74    | 33.33        |
|      | Median  | 53.85    | 55.56 | 55.56 | 55.56 | 55.56 | 55.56 | 51.85 | 55.56        | 59.26    | 56.62        |
|      | Mean    | 54.77    | 54.25 | 54.84 | 56.11 | 56.26 | 56.26 | 52.09 | 56.76        | 59.45    | 57.28        |
|      | Maximum | 77.78    | 77.78 | 77.78 | 81.48 | 81.48 | 81.48 | 70.37 | 77.78        | 77.78    | 76.92        |
| DS2  | Minimum | 42.31    | 33.33 | 38.46 | 37.04 | 38.46 | 38.46 | 33.33 | 37.04        | 42.31    | <b>44.44</b> |
|      | Median  | 55.56    | 55.56 | 55.56 | 55.56 | 55.56 | 55.56 | 51.85 | 57.69        | 59.26    | <b>62.96</b> |
|      | Mean    | 57.38    | 55.14 | 55.66 | 55.59 | 55.66 | 55.66 | 52.31 | 56.63        | 59.98    | <b>62.14</b> |
|      | Maximum | 81.48    | 73.08 | 74.07 | 74.07 | 74.07 | 74.07 | 73.08 | 80.77        | 80.77    | 81.48        |
| DS3  | Minimum | 38.46    | 34.62 | 34.62 | 34.62 | 34.62 | 34.62 | 33.33 | 34.62        | 38.46    | 44.44        |
|      | Median  | 55.56    | 55.56 | 55.56 | 55.56 | 55.56 | 55.56 | 51.85 | 59.26        | 59.26    | 62.96        |
|      | Mean    | 57.15    | 55.96 | 56.25 | 56.18 | 56.25 | 56.25 | 52.02 | 57.44        | 58.79    | 62.23        |
|      | Maximum | 77.78    | 77.78 | 77.78 | 77.78 | 77.78 | 77.78 | 70.37 | 80.77        | 84.62    | 81.48        |
| DS4  | Minimum | 42.31    | 38.46 | 38.46 | 38.46 | 38.46 | 38.46 | 34.62 | 33.33        | 40.74    | 38.46        |
|      | Median  | 55.56    | 55.56 | 57.69 | 58.48 | 58.48 | 57.69 | 51.85 | 59.26        | 59.26    | 59.26        |
|      | Mean    | 57.30    | 55.98 | 56.86 | 56.94 | 56.94 | 56.86 | 52.69 | 58.74        | 60.90    | 58.48        |
|      | Maximum | 85.19    | 80.77 | 80.77 | 80.77 | 80.77 | 80.77 | 76.92 | 80.77        | 85.19    | 81.48        |
| DS5  | Minimum | 42.31    | 38.46 | 38.46 | 38.46 | 38.46 | 38.46 | 7.41  | 37.04        | 42.31    | 42.31        |
|      | Median  | 56.62    | 57.69 | 57.69 | 57.69 | 57.69 | 57.69 | 33.33 | 59.26        | 59.26    | 59.26        |
|      | Mean    | 58.64    | 56.71 | 56.86 | 56.86 | 56.86 | 56.86 | 33.19 | 58.49        | 60.65    | 61.02        |
|      | Maximum | 85.19    | 81.48 | 81.48 | 81.48 | 81.48 | 81.48 | 51.85 | 80.77        | 81.48    | 81.48        |
| DS6  | Minimum | 38.46    | 34.62 | 34.62 | 34.62 | 34.62 | 34.62 | 0.00  | 40.74        | 40.74    | 42.31        |
|      | Median  | 58.48    | 55.56 | 55.56 | 55.56 | 55.56 | 55.56 | 5.63  | 59.26        | 59.26    | 62.96        |
|      | Mean    | 58.28    | 55.81 | 56.25 | 56.18 | 55.95 | 56.25 | 5.97  | 59.15        | 59.98    | 61.40        |
|      | Maximum | 81.48    | 74.07 | 77.78 | 77.78 | 77.78 | 77.78 | 18.52 | <b>85.19</b> | 77.78    | 77.78        |

Table 6: Logloss of Different Classifiers

|      |         | GAMBoost     | RLR   | PMR   | BGLM  | PLR   | GLM   | SDWD  | GBM   | GAMLOESS     | NB           |
|------|---------|--------------|-------|-------|-------|-------|-------|-------|-------|--------------|--------------|
| PIDD | Minimum | 37.18        | 37.94 | 38.48 | 37.71 | 37.64 | 37.62 | 43.58 | 37.66 | 36.31        | 35.24        |
|      | Median  | 46.42        | 48.17 | 48.17 | 48.10 | 48.11 | 48.11 | 50.57 | 46.89 | 46.92        | 56.27        |
|      | Mean    | 46.77        | 48.50 | 48.52 | 48.50 | 48.51 | 48.52 | 50.41 | 47.50 | 47.95        | 55.93        |
|      | Maximum | 58.26        | 62.50 | 61.90 | 62.78 | 62.81 | 62.97 | 59.13 | 57.96 | 69.86        | 81.20        |
| DS1  | Minimum | 36.49        | 38.47 | 38.06 | 38.14 | 38.06 | 38.06 | 44.19 | 35.52 | 33.41        | 34.02        |
|      | Median  | 47.05        | 48.90 | 48.94 | 48.93 | 48.94 | 48.94 | 50.96 | 47.67 | 46.13        | 49.88        |
|      | Mean    | 47.09        | 49.05 | 49.05 | 49.04 | 49.04 | 49.05 | 50.98 | 47.33 | 47.07        | 51.56        |
|      | Maximum | 57.86        | 64.40 | 64.77 | 64.56 | 64.76 | 64.77 | 60.26 | 57.44 | 72.65        | 72.77        |
| DS2  | Minimum | 36.22        | 38.49 | 37.57 | 37.66 | 37.61 | 37.57 | 43.47 | 36.39 | 34.63        | 35.30        |
|      | Median  | 46.00        | 48.06 | 48.04 | 48.00 | 48.04 | 48.04 | 50.38 | 47.00 | 46.43        | 49.54        |
|      | Mean    | 46.53        | 48.59 | 48.59 | 48.57 | 48.58 | 48.59 | 50.41 | 47.14 | 47.03        | 48.60        |
|      | Maximum | 58.01        | 64.69 | 65.21 | 64.95 | 65.20 | 65.21 | 59.61 | 57.48 | 70.87        | 66.84        |
| DS3  | Minimum | 36.36        | 37.88 | 37.31 | 37.42 | 37.31 | 37.31 | 44.03 | 35.95 | 34.25        | 34.72        |
|      | Median  | 46.90        | 48.94 | 48.93 | 48.93 | 48.93 | 48.93 | 50.97 | 47.54 | 46.27        | 49.58        |
|      | Mean    | 46.82        | 49.07 | 49.07 | 49.06 | 49.07 | 49.07 | 50.96 | 47.47 | 47.21        | 49.55        |
|      | Maximum | 58.17        | 64.65 | 65.14 | 64.91 | 65.14 | 65.14 | 60.13 | 57.88 | 73.07        | 64.11        |
| DS4  | Minimum | 36.77        | 37.78 | 37.28 | 37.38 | 37.32 | 37.28 | 43.48 | 35.52 | 34.97        | <b>30.98</b> |
|      | Median  | 45.59        | 49.11 | 49.14 | 49.13 | 49.13 | 49.14 | 51.43 | 46.62 | 45.82        | 51.38        |
|      | Mean    | <b>46.68</b> | 49.43 | 49.44 | 49.42 | 49.43 | 49.44 | 51.25 | 47.17 | 46.82        | 51.29        |
|      | Maximum | <b>56.83</b> | 60.79 | 61.26 | 61.14 | 61.10 | 61.26 | 58.40 | 57.78 | 71.40        | 73.04        |
| DS5  | Minimum | 36.07        | 37.37 | 36.81 | 36.92 | 36.84 | 36.81 | 43.31 | 34.93 | 34.61        | 32.13        |
|      | Median  | 45.79        | 49.38 | 49.40 | 49.39 | 49.39 | 49.40 | 51.49 | 46.44 | 45.71        | 47.87        |
|      | Mean    | 46.43        | 49.42 | 49.43 | 49.42 | 49.43 | 49.43 | 51.20 | 47.06 | 46.76        | 47.26        |
|      | Maximum | 57.40        | 61.55 | 62.05 | 61.90 | 62.04 | 62.05 | 58.45 | 58.52 | 71.76        | 63.24        |
| DS6  | Minimum | 36.15        | 37.87 | 37.45 | 37.56 | 37.45 | 37.45 | 44.24 | 36.39 | 34.79        | 33.94        |
|      | Median  | 46.69        | 49.95 | 50.06 | 50.04 | 50.06 | 50.06 | 51.96 | 46.49 | <b>45.58</b> | 46.42        |
|      | Mean    | 46.61        | 49.72 | 49.72 | 49.72 | 49.68 | 49.72 | 51.56 | 47.13 | 46.66        | 47.07        |
|      | Maximum | 57.53        | 61.76 | 62.14 | 62.00 | 62.14 | 62.14 | 58.90 | 57.58 | 73.71        | 61.63        |

Table 7: Average Best Classification Results for Different Dataset

|      |         | Accuracy | Kappa | AUROC | Sensitivity | Specificity | Logloss |
|------|---------|----------|-------|-------|-------------|-------------|---------|
| PIDD | Minimum |          |       |       |             |             |         |
|      | Median  |          |       |       |             |             |         |
|      | Mean    |          |       |       |             |             |         |
|      | Maximum |          |       |       |             |             |         |
| DS1  | Minimum |          |       |       |             |             |         |
|      | Median  |          |       |       |             |             |         |
|      | Mean    |          |       |       |             |             |         |
|      | Maximum |          |       |       |             |             |         |
| DS2  | Minimum |          |       |       |             | 38.52       |         |
|      | Median  |          |       |       |             |             |         |
|      | Mean    |          |       | 83.52 |             |             |         |
|      | Maximum |          |       |       |             |             |         |
| DS3  | Minimum |          |       |       |             |             |         |
|      | Median  |          |       |       |             |             |         |
|      | Mean    |          |       |       |             |             |         |
|      | Maximum |          |       |       |             |             |         |
| DS4  | Minimum |          |       |       |             |             |         |
|      | Median  |          |       |       |             | 57.31       |         |
|      | Mean    |          |       |       |             | 57.17       |         |
|      | Maximum |          |       |       |             | 81.34       |         |
| DS5  | Minimum | 68.15    | 26.25 | 73.02 | 78.60       |             | 36.58   |
|      | Median  | 77.45    | 47.94 | 83.74 |             |             |         |
|      | Mean    | 77.27    | 47.33 |       |             |             |         |
|      | Maximum | 87.53    | 72.26 |       |             |             | 61.90   |
| DS6  | Minimum |          |       |       |             |             |         |
|      | Median  |          |       |       | 88.90       |             |         |
|      | Mean    |          |       |       | 88.46       |             |         |
|      | Maximum |          |       | 93.23 | 97.40       |             |         |
